# Supplementary material
Source: HighWire-hosted journal article supplement (http://hw-f5-jim.highwire.org/highwire/filestream/139185/field_highwire_adjunct_files/3/AFMR_Podcasts_2021_69_6.pdf)

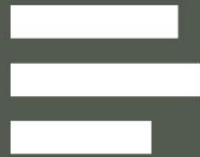

LISTEN TO THE

# AFMR PODCASTS

[www.afmr.org/podcasts](http://www.afmr.org/podcasts)

---

## THROMBOSIS AND ANTICOAGULANTS – INPATIENT AND OUTPATIENT

**Guest: Mateo Porres-Aguilar, MD**  
**Texas Tech University Health Sciences**  
**Center, El Paso, TX**

**Recorded: May 28, 2021**

In this episode of the JIM Podcast, Editor-in-Chief Richard McCallum speaks with Dr. Porres-Aguilar about thrombosis and anticoagulants. Dr. Porres-Aguilar is a current Fellow of the American College of Physicians (FACP), he holds a National Board Certification of Anticoagulation Care Providers in the USA (NCBAP), is an academic Member of the International Society for Thrombosis and Hemostasis (ISTH), and he currently serves as an international representative in North America for the Mexican Society of Thrombosis and Hemostasis (SOMETH), and is part of the Latin-american chapter of Venous Thrombosis for the Latin-American Collaborative Group for Hemostasis and Thrombosis (Grupo CLAHT)

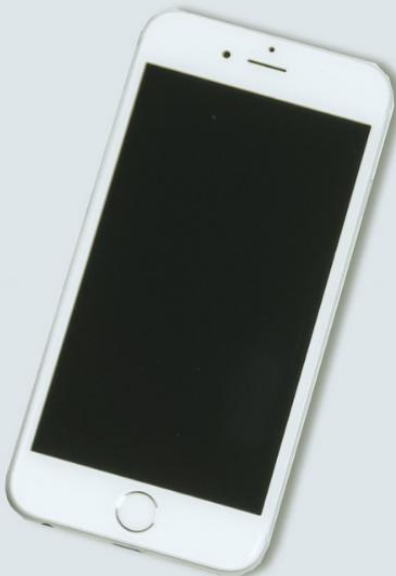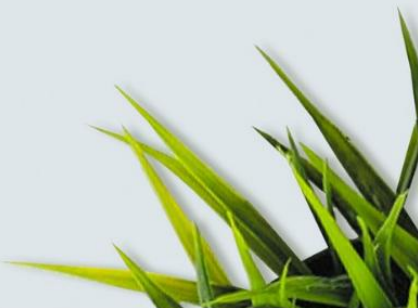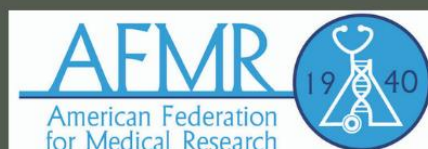

Supplement: AFMR_Podcasts_2021_69_6.pdf [file AFMR_Podcasts_2021_69_6.pdf]
